# Supplementary material for: Safety Concerns Related to the Simultaneous Use of Prescription or Over-the-Counter Medications and Herbal Medicinal Products: Survey Results among Latvian Citizens
Source: MDPI journal article supplement (doi:10.3390/ijerph20166551), 2023-08-09
Supplement: s1 [file s1]

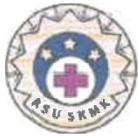

## Minutes Nr. 31

December 5, 2019

Meeting opened at 15:00

Meeting closed at 15:20

### Agenda:

1. Review and evaluate RSU RCMC lecturer's Elita Ardava research documentation
2. Confirm the Ethics Commission decision

Meeting chaired by: Head of Ethics Commission Ilze Sauškina

Minutes taken by: Member of Ethics Commission Renāte Šukele

Participants: Deputy Head of Ethics Commission Ilze Celma

### Documents submitted to the Commission:

1. Application
2. Questionnaire

Name of the research: The use of drugs, nutritional supplements and herbal medication

Research method: quantitative research

Research respondents: No less than 500 pharmacy clients of age 18 and above, who purchase drugs, nutritional supplements and herbal medication

Research base: Latvia pharmacies in different regions

Meeting participants' decision: After reviewing the submitted documents the commission decided that the research corresponds to the ethical requirements and it is allowed to carry out the research.

Chair of the meeting: Ilze Sauškina [signature]

Minute taker: Renāte Šukele [signature]
